# Supplementary material for: Impact of Atmospheric Polycyclic Aromatic Hydrocarbons (PAHs) of Falling Dust in Urban Area Settings: Status, Chemical Composition, Sources and Potential Human Health Risks
Source: MDPI journal article supplement (doi:10.3390/ijerph20021216), 2023-01-10
Supplement: s1 [file s1]

**Table S1.** Description of measured polycyclic aromatic hydrocarbons (PAHs).

| PAH Name               | Symbol used in this<br>study | Number of rings |
|------------------------|------------------------------|-----------------|
| Naphthalene            | P <sub>1</sub>               | 2               |
| Acenaphthylene         | P <sub>2</sub>               | 3               |
| Acenaphthene           | P <sub>3</sub>               | 3               |
| Fluorene               | P <sub>4</sub>               | 3               |
| Phenanthrene           | P <sub>5</sub>               | 3               |
| Anthracene             | P <sub>6</sub>               | 3               |
| Fluoranthene           | P <sub>7</sub>               | 4               |
| Pyrene                 | P <sub>8</sub>               | 4               |
| Benzo(b+)fluoranthene  | P <sub>9</sub>               | 5               |
| Benzo(k)fluoranthene   | P <sub>10</sub>              | 5               |
| Benzo(a)pyrene         | P <sub>11</sub>              | 5               |
| 3-Methylcholanthrene   | P <sub>12</sub>              | 4               |
| Dibenz(a,h)acridine    | P <sub>13</sub>              | 5               |
| Indeno(1.2.3-cd)pyrene | P <sub>14</sub>              | 6               |
| Dibenz(a,h)anthracene  | P <sub>15</sub>              | 5               |
| Benzo(g,h,i)perylene   | P <sub>16</sub>              | 6               |
